# Supplementary material for: SCOPEOUT: sustainability and spread of quality improvement activities in long-term care- a mixed methods approach
Source: Springer Nature journal article supplement (doi:10.1186/s12913-018-2978-0), 2018-03-12
Supplement: MOESM3 [file 15527640]

**Additional File 3: Survey items by time of data collection, including rates of missing items**

|                                                                                                                          |                | Time 1      | Time 2     | Time 3     | Time 4     | Time 5     |
|--------------------------------------------------------------------------------------------------------------------------|----------------|-------------|------------|------------|------------|------------|
| <b>Quality improvement activities, N (%)</b>                                                                             |                |             |            |            |            |            |
| Are there currently any quality improvement activities on the unit?                                                      | Yes            | 108 (94.7%) | 84 (84.8%) | 85 (71.4%) | 80 (84.2%) | 67 (63.2%) |
|                                                                                                                          | No             | 6 (5.3%)    | 15 (15.2%) | 34 (28.6%) | 15 (15.8%) | 39 (36.8%) |
| Does your quality improvement activity involve Plan-Do-Study-Act (PDSA) cycles?                                          | Yes            | 92 (80.7%)  | 70 (70.7%) | 69 (58.0%) | 56 (58.9%) | 56 (52.8%) |
|                                                                                                                          | No             | 11 (9.6%)   | 10 (10.1%) | 14 (11.8%) | 22 (23.2%) | 11 (10.4%) |
|                                                                                                                          | NA             | 6 (5.3%)    | 15 (15.2%) | 34 (28.6%) | 15 (15.8%) | 39 (36.8%) |
|                                                                                                                          | <i>Missing</i> | 5 (4.4%)    | 4 (4.0%)   | 2 (1.7%)   | 2 (2.1%)   | —          |
| Does your quality improvement team use information from SCOPE binders at your meetings?                                  | Yes            | 58 (50.9%)  | 46 (46.5%) | 40 (33.6%) | 45 (47.4%) | 44 (41.5%) |
|                                                                                                                          | No             | 47 (41.2%)  | 37 (37.4%) | 45 (37.8%) | 35 (36.8%) | 23 (21.7%) |
|                                                                                                                          | NA             | 6 (5.3%)    | 15 (15.2%) | 34 (28.6%) | 15 (15.8%) | 39 (36.8%) |
|                                                                                                                          | <i>Missing</i> | 3 (2.6%)    | 1 (1.0%)   | —          | —          | —          |
| Does your quality improvement team use information on current activity with residents at your meetings?                  | Yes            | 76 (66.7%)  | 56 (56.6%) | 61 (51.3%) | 61 (64.2%) | 58 (54.7%) |
|                                                                                                                          | No             | 29 (25.4%)  | 27 (27.3%) | 24 (20.2%) | 19 (20.0%) | 9 (8.5%)   |
|                                                                                                                          | NA             | 6 (5.3%)    | 15 (15.2%) | 34 (28.6%) | 15 (15.8%) | 39 (36.8%) |
|                                                                                                                          | <i>Missing</i> | 3 (2.6%)    | 1 (1.0%)   | —          | —          | —          |
| Does your quality improvement team use your local facility resident assessment indicators at your meetings?              | Yes            | 52 (45.6%)  | 42 (42.4%) | 40 (33.6%) | 44 (46.3%) | 39 (36.8%) |
|                                                                                                                          | No             | 53 (46.5%)  | 41 (41.4%) | 45 (37.8%) | 36 (37.9%) | 28 (26.4%) |
|                                                                                                                          | NA             | 6 (5.3%)    | 15 (15.2%) | 34 (28.6%) | 15 (15.8%) | 39 (36.8%) |
|                                                                                                                          | <i>Missing</i> | 3 (2.6%)    | 1 (1.0%)   | —          | —          | —          |
| Does your quality improvement team use new published research evidence in your quality area at your meetings?            | Yes            | 27 (23.7%)  | 17 (17.2%) | 20 (16.8%) | 26 (27.4%) | 20 (18.9%) |
|                                                                                                                          | No             | 78 (68.4%)  | 66 (66.7%) | 65 (54.6%) | 54 (56.8%) | 47 (44.3%) |
|                                                                                                                          | NA             | 6 (5.3%)    | 15 (15.2%) | 34 (28.6%) | 15 (15.8%) | 39 (36.8%) |
|                                                                                                                          | <i>Missing</i> | 3 (2.6%)    | 1 (1.0%)   | —          | —          | —          |
| Does your quality improvement team use discussing resident care plans on your quality improvement area at your meetings? | Yes            | 85 (74.6%)  | 59 (59.6%) | 61 (51.3%) | 67 (70.5%) | 58 (54.7%) |
|                                                                                                                          | No             | 20 (17.5%)  | 24 (24.2%) | 24 (20.2%) | 13 (13.7%) | 9 (8.5%)   |
|                                                                                                                          | NA             | 6 (5.3%)    | 15 (15.2%) | 34 (28.6%) | 15 (15.8%) | 39 (36.8%) |
|                                                                                                                          | <i>Missing</i> | 3 (2.6%)    | 1 (1.0%)   | —          | —          | —          |
| Does your quality improvement team use discussing new developments in care for your residents at your meetings?          | Yes            | 76 (66.7%)  | 56 (56.6%) | 62 (52.1%) | 67 (70.5%) | 53 (50.0%) |
|                                                                                                                          | No             | 29 (25.4%)  | 27 (27.3%) | 23 (19.3%) | 13 (13.7%) | 14 (13.2%) |
|                                                                                                                          | NA             | 6 (5.3%)    | 15 (15.2%) | 34 (28.6%) | 15 (15.8%) | 39 (36.8%) |
|                                                                                                                          | <i>Missing</i> | 3 (2.6%)    | 1 (1.0%)   | —          | —          | —          |
| Does your quality improvement team use other information about your quality improvement activity at your meetings?       | Yes            | 6 (5.3%)    | 14 (14.1%) | 9 (7.6%)   | 5 (5.3%)   | 4 (3.8%)   |
|                                                                                                                          | No             | 98 (86%)    | 69 (69.7%) | 76 (63.9%) | 75 (78.9%) | 63 (59.4%) |
|                                                                                                                          | NA             | 6 (5.3%)    | 15 (15.2%) | 34 (28.6%) | 15 (15.8%) | 39 (36.8%) |
|                                                                                                                          | <i>Missing</i> | 4 (3.5%)    | 1 (1.0%)   | —          | —          | —          |
| <b>Inclusion of others, N (%)</b>                                                                                        |                |             |            |            |            |            |
| Do you or your team include others on the unit in your work by shift reports?                                            | Yes            | 105 (92.1%) | 80 (80.8%) | 82 (68.9%) | 78 (82.1%) | 62 (58.5%) |
|                                                                                                                          | No             | 3 (2.6%)    | 4 (4.0%)   | 3 (2.5%)   | 2 (2.1%)   | 5 (4.7%)   |
|                                                                                                                          | NA             | 6 (5.3%)    | 15 (15.2%) | 34 (28.6%) | 15 (15.8%) | 39 (36.8%) |
| Do you or your team include others on the unit in your work by storyboards?                                              | Yes            | 19 (16.7%)  | 22 (22.2%) | 22 (18.5%) | 13 (13.7%) | 19 (17.9%) |
|                                                                                                                          | No             | 89 (78.1%)  | 62 (62.6%) | 63 (52.9%) | 67 (70.5%) | 48 (45.3%) |
|                                                                                                                          | NA             | 6 (5.3%)    | 15 (15.2%) | 34 (28.6%) | 15 (15.8%) | 39 (36.8%) |
| Do you or your team include others on the unit in your work by whiteboard?                                               | Yes            | 48 (42.1%)  | 44 (44.4%) | 43 (36.1%) | 31 (32.6%) | 40 (37.7%) |
|                                                                                                                          | No             | 60 (52.6%)  | 40 (40.4%) | 42 (35.3%) | 49 (51.6%) | 27 (25.5%) |
|                                                                                                                          | NA             | 6 (5.3%)    | 15 (15.2%) | 34 (28.6%) | 15 (15.8%) | 39 (36.8%) |
|                                                                                                                          | Yes            | 18 (15.8%)  | 22 (22.2%) | 20 (16.8%) | 14 (14.7%) | 20 (18.9%) |

|                                                                                               |                | Time 1      | Time 2      | Time 3      | Time 4      | Time 5      |
|-----------------------------------------------------------------------------------------------|----------------|-------------|-------------|-------------|-------------|-------------|
| Do you or your team include others on the unit in your work by storytelling?                  | No             | 90 (78.9%)  | 62 (62.6%)  | 65 (54.6%)  | 66 (69.5%)  | 47 (44.3%)  |
|                                                                                               | NA             | 6 (5.3%)    | 15 (15.2%)  | 34 (28.6%)  | 15 (15.8%)  | 39 (36.8%)  |
| Do you or your team include others on the unit in your work by role modeling?                 | Yes            | 34 (29.8%)  | 24 (24.2%)  | 27 (22.7%)  | 23 (24.2%)  | 23 (21.7%)  |
|                                                                                               | No             | 74 (64.9%)  | 60 (60.6%)  | 58 (48.7%)  | 57 (60.0%)  | 44 (41.5%)  |
|                                                                                               | NA             | 6 (5.3%)    | 15 (15.2%)  | 34 (28.6%)  | 15 (15.8%)  | 39 (36.8%)  |
| Do you or your team include others on the unit in your work by weekly group huddles?          | Yes            | 32 (28.1%)  | 26 (26.3%)  | 24 (20.2%)  | 16 (16.8%)  | 23 (21.7%)  |
|                                                                                               | No             | 76 (66.7%)  | 58 (58.6%)  | 61 (51.3%)  | 64 (67.4%)  | 44 (41.5%)  |
|                                                                                               | NA             | 6 (5.3%)    | 15 (15.2%)  | 34 (28.6%)  | 15 (15.8%)  | 39 (36.8%)  |
| Do you or your team include others on the unit in your work by other ways?                    | Yes            | 20 (17.5%)  | 14 (14.1%)  | 16 (13.4%)  | 14 (14.7%)  | 10 (9.4%)   |
|                                                                                               | No             | 87 (76.3%)  | 70 (70.7%)  | 69 (58.0%)  | 66 (69.5%)  | 57 (53.8%)  |
|                                                                                               | NA             | 6 (5.3%)    | 15 (15.2%)  | 34 (28.6%)  | 15 (15.8%)  | 39 (36.8%)  |
|                                                                                               | Missing        | 1 (0.9%)    | —           | —           | —           | —           |
| <b>Empowerment</b>                                                                            |                |             |             |             |             |             |
| I am involved in the QI activities in my unit based team                                      | M (SD)         | 3.74 (1.11) | 3.36 (1.30) | 3.16 (1.51) | 3.41 (1.25) | 2.85 (1.54) |
|                                                                                               | NA             | 6 (5.3%)    | 15 (15.2%)  | 34 (28.6)   | 15 (15.8%)  | 39 (36.8)   |
|                                                                                               | Missing, N (%) | 1 (0.9%)    | 1 (1.0%)    | —           | —           | —           |
| The person or persons to whom I report most of the time is involved in my QI team's activity  | M (SD)         | 3.82 (1.04) | 3.52 (1.28) | 3.29 (1.55) | 3.46 (1.26) | 2.86 (1.59) |
|                                                                                               | NA             | 6 (5.3%)    | 15 (15.2%)  | 34 (28.6)   | 15 (15.8%)  | 39 (36.8)   |
|                                                                                               | Missing, N (%) | —           | —           | 1 (0.8%)    | 1 (1.1%)    | —           |
| It is possible for me to make the changes to achieve our quality improvement goals on my unit | M (SD)         | 3.94 (0.81) | 3.94 (0.83) | 3.80 (0.91) | 3.87 (0.69) | 4.01 (0.62) |
|                                                                                               | NA             | 6 (5.3%)    | 15 (15.2%)  | 34 (28.6)   | 15 (15.8%)  | 39 (36.8)   |
|                                                                                               | Missing, N (%) | —           | —           | —           | 1 (1.1%)    | —           |
| I can make the changes needed on my unit to improve resident care                             | M (SD)         | 3.71 (1.05) | 3.46 (1.35) | 3 (1.47)    | 3.38 (1.34) | 2.79 (1.48) |
|                                                                                               | NA             | 6 (5.3%)    | 15 (15.2%)  | 34 (28.6)   | 15 (15.8%)  | 39 (36.8)   |
|                                                                                               | Missing, N (%) | —           | 1 (1.0%)    | —           | —           | —           |
| <b>Satisfaction with quality of work life</b>                                                 |                |             |             |             |             |             |
| Overall I am satisfied with the quality of my work life                                       | M (SD)         | 3.91 (0.88) | 4.05 (0.75) | 4.04 (0.81) | 3.85 (0.97) | 3.98 (0.77) |
|                                                                                               | Missing, N (%) | 5 (4.4%)    | 4 (4.0%)    | —           | —           | 1 (0.9%)    |
