# Supplementary material for: SCOPEOUT: sustainability and spread of quality improvement activities in long-term care- a mixed methods approach
Source: Springer Nature journal article supplement (doi:10.1186/s12913-018-2978-0), 2018-03-12
Supplement: MOESM4 [file 15527640]

## Quality Improvement Activities

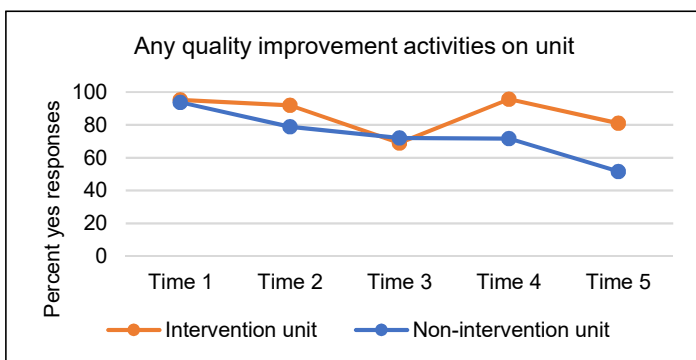

| Parameter                                             | OR [95% CI]                 |
|-------------------------------------------------------|-----------------------------|
| Age (< 25 years = reference)                          |                             |
| 25-34 years                                           | 0.764 [0.174; 3.364]        |
| 35-44 years                                           | 1.119 [0.260; 4.820]        |
| 45-54 years                                           | 1.222 [0.285; 5.241]        |
| >54 years                                             | 0.891 [0.185; 4.285]        |
| Female (Male = reference)                             | 1.259 [0.584; 2.712]        |
| Care aide (Reg. provider= reference)                  | 0.724 [0.362; 1.447]        |
| Years worked in current role                          | 1.012 [0.970; 1.055]        |
| Years worked on unit                                  | 1.010 [0.961; 1.062]        |
| Time                                                  | <b>0.689 [0.591; 0.804]</b> |
| Study group (Non-interv. = reference)                 | 0.521 [0.157; 1.730]        |
| Time by study group (Time by non-interv. = reference) | <b>1.481 [1.087; 2.019]</b> |
| Number of beds                                        | <b>1.006 [1.002; 1.010]</b> |
| Public (Voluntary = reference)                        | 2.634 [0.460; 15.088]       |
| SCOPEout rank (Low = reference)                       |                             |
| High                                                  | <b>2.365 [1.073; 5.214]</b> |
| Medium                                                | <b>3.505 [1.510; 8.139]</b> |

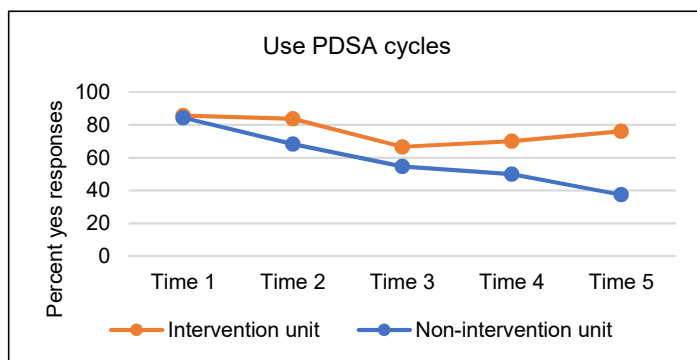

| Parameter                                             | OR [95% CI]                  |
|-------------------------------------------------------|------------------------------|
| Age (< 25 years = reference)                          |                              |
| 25-34 years                                           | 0.571 [0.112; 2.905]         |
| 35-44 years                                           | 0.951 [0.197; 4.595]         |
| 45-54 years                                           | 1.060 [0.218; 5.156]         |
| >54 years                                             | 0.721 [0.136; 3.812]         |
| Female (Male = reference)                             | 1.030 [0.537; 1.977]         |
| Care aide (Reg. provider= reference)                  | 1.352 [0.787; 2.325]         |
| Years worked in current role                          | 0.998 [0.963; 1.035]         |
| Years worked on unit                                  | 1.021 [0.979; 1.065]         |
| Time                                                  | <b>0.719 [0.620; 0.833]</b>  |
| Study group (Non-interv. = reference)                 | 0.479 [0.163; 1.410]         |
| Time by study group (Time by non-interv. = reference) | <b>1.503 [1.111; 2.034]</b>  |
| Number of beds                                        | <b>1.008 [1.005; 1.012]</b>  |
| Public (Voluntary = reference)                        | <b>6.529 [1.437; 29.666]</b> |
| SCOPEout rank (Low = reference)                       |                              |
| High                                                  | <b>5.019 [2.270; 11.097]</b> |
| Medium                                                | <b>4.706 [2.123; 10.432]</b> |

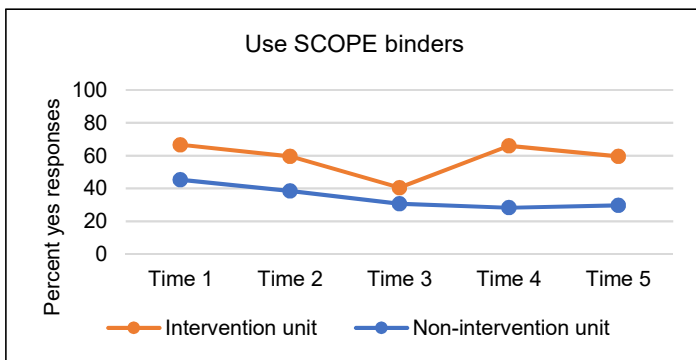

| Parameter                                             | OR [95% CI]                    |
|-------------------------------------------------------|--------------------------------|
| Age (< 25 years = reference)                          |                                |
| 25-34 years                                           | 1.810 [0.308; 10.651]          |
| 35-44 years                                           | 3.267 [0.609; 17.533]          |
| 45-54 years                                           | 2.370 [0.442; 12.712]          |
| >54 years                                             | 1.545 [0.272; 8.759]           |
| Female (Male = reference)                             | 1.942 [0.888; 4.247]           |
| Care aide (Reg. provider= reference)                  | 1.337 [0.759; 2.356]           |
| Years worked in current role                          | 1.005 [0.973; 1.038]           |
| Years worked on unit                                  | 1.036 [0.997; 1.076]           |
| Time                                                  | 0.946 [0.828; 1.081]           |
| Study group (Non-interv. = reference)                 | 1.166 [0.467; 2.910]           |
| Time by study group (Time by non-interv. = reference) | 1.253 [0.960; 1.637]           |
| Number of beds                                        | <b>1.011 [1.006; 1.016]</b>    |
| Public (Voluntary = reference)                        | <b>30.995 [5.406; 177.710]</b> |
| SCOPEout rank (Low = reference)                       |                                |
| High                                                  | <b>8.102 [2.939; 22.335]</b>   |
| Medium                                                | <b>8.236 [3.119; 21.745]</b>   |

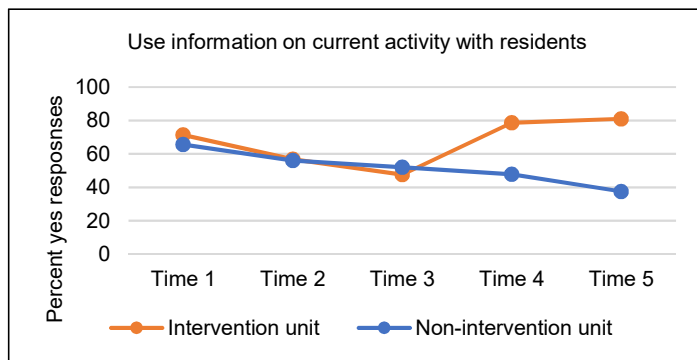

| Parameter                                             | OR [95% CI]                 |
|-------------------------------------------------------|-----------------------------|
| Age (< 25 years = reference)                          |                             |
| 25-34 years                                           | 0.339 [0.071; 1.621]        |
| 35-44 years                                           | 0.548 [0.123; 2.440]        |
| 45-54 years                                           | 0.470 [0.105; 2.094]        |
| >54 years                                             | 0.319 [0.067; 1.514]        |
| Female (Male = reference)                             | <b>2.180 [1.152; 4.126]</b> |
| Care aide (Reg. provider= reference)                  | 0.511 [0.300; 0.869]        |
| Years worked in current role                          | 1.005 [0.974; 1.036]        |
| Years worked on unit                                  | 1.020 [0.980; 1.060]        |
| Time                                                  | 0.960 [0.849; 1.086]        |
| Study group (Non-interv. = reference)                 | <b>0.379 [0.160; 0.897]</b> |
| Time by study group (Time by non-interv. = reference) | <b>1.664 [1.296; 2.136]</b> |
| Number of beds                                        | <b>1.004 [1.001; 1.008]</b> |
| Public (Voluntary = reference)                        | 3.662 [0.865; 15.498]       |
| SCOPEout rank (Low = reference)                       |                             |
| High                                                  | <b>2.579 [1.192; 5.582]</b> |
| Medium                                                | <b>3.365 [1.562; 7.249]</b> |

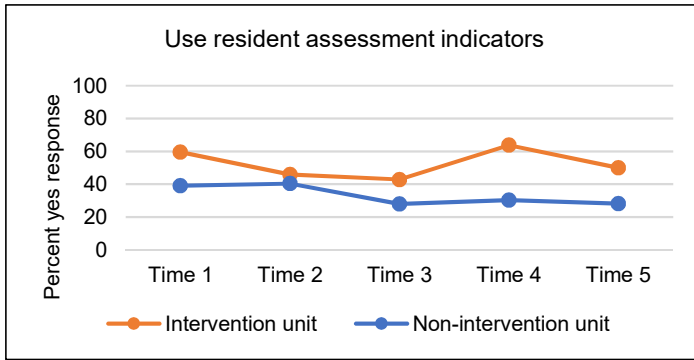

| Parameter                                                | OR [95% CI]                 |
|----------------------------------------------------------|-----------------------------|
| Age (< 25 years = reference)                             |                             |
| 25-34 years                                              | 1.406 [0.303; 6.522]        |
| 35-44 years                                              | 2.294 [0.537; 9.805]        |
| 45-54 years                                              | 2.014 [0.467; 8.677]        |
| >54 years                                                | 1.874 [0.401; 8.767]        |
| Female (Male = reference)                                | 1.595 [0.827; 3.076]        |
| Care aide (Reg. provider= reference)                     | 0.739 [0.450; 1.216]        |
| Years worked in current role                             | 1.016 [0.987; 1.046]        |
| Years worked on unit                                     | 1.010 [0.974; 1.047]        |
| Time                                                     | 0.955 [0.837; 1.089]        |
| Study group (Non-interv. = reference)                    | 0.849 [0.345; 2.085]        |
| Time by study group<br>(Time by non-interv. = reference) | <b>1.309 [1.002; 1.710]</b> |
| Number of beds                                           | 1.003 [0.999; 1.006]        |
| Public (Voluntary = reference)                           | 1.922 [0.452; 8.171]        |
| SCOPEout rank (Low = reference)                          |                             |
| High                                                     | 1.686 [0.756; 3.760]        |
| Medium                                                   | <b>2.415 [1.119; 5.214]</b> |

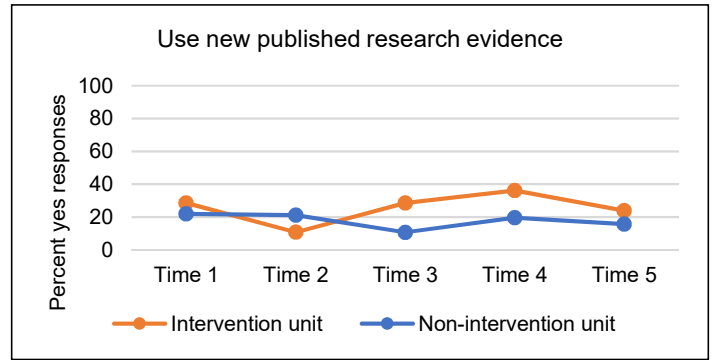

| Parameter                                                | OR [95% CI]                 |
|----------------------------------------------------------|-----------------------------|
| Age (< 25 years = reference)                             |                             |
| 25-34 years                                              | 0.462 [0.089; 2.396]        |
| 35-44 years                                              | 1.006 [0.235; 4.308]        |
| 45-54 years                                              | 0.397 [0.086; 1.837]        |
| >54 years                                                | 0.533 [0.110; 2.571]        |
| Female (Male = reference)                                | 2.439 [0.920; 6.463]        |
| Care aide (Reg. provider= reference)                     | 1.064 [0.585; 1.935]        |
| Years worked in current role                             | 1.030 [0.995; 1.067]        |
| Years worked on unit                                     | 1.014 [0.978; 1.051]        |
| Time                                                     | 1.010 [0.857; 1.190]        |
| Study group (Non-interv. = reference)                    | 0.881 [0.294; 2.637]        |
| Time by study group<br>(Time by non-interv. = reference) | 1.253 [0.897; 1.750]        |
| Number of beds                                           | <b>1.003 [1.001; 1.005]</b> |
| Public (Voluntary = reference)                           | NA                          |
| SCOPEout rank (Low = reference)                          |                             |
| High                                                     | 0.831 [0.376; 1.835]        |
| Medium                                                   | 1.412 [0.818; 2.438]        |

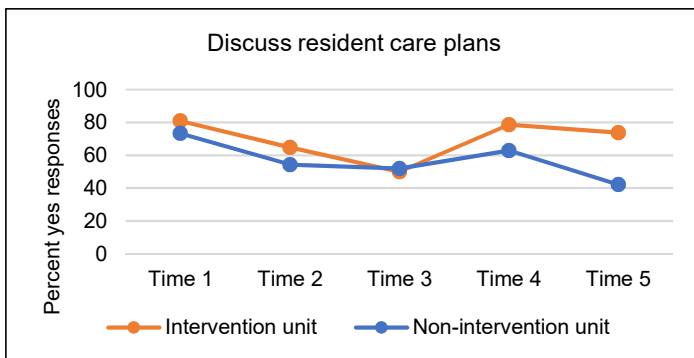

| Parameter                                                | OR [95% CI]                 |
|----------------------------------------------------------|-----------------------------|
| Age (< 25 years = reference)                             |                             |
| 25-34 years                                              | 0.286 [0.060; 1.364]        |
| 35-44 years                                              | 0.358 [0.080; 1.608]        |
| 45-54 years                                              | 0.382 [0.085; 1.708]        |
| >54 years                                                | 0.367 [0.076; 1.781]        |
| Female (Male = reference)                                | 1.255 [0.679; 2.317]        |
| Care aide (Reg. provider= reference)                     | 0.707 [0.419; 1.192]        |
| Years worked in current role                             | 1.016 [0.983; 1.050]        |
| Years worked on unit                                     | 1.013 [0.972; 1.055]        |
| Time                                                     | <b>0.878 [0.774; 0.996]</b> |
| Study group (Non-interv. = reference)                    | 0.666 [0.271; 1.638]        |
| Time by study group<br>(Time by non-interv. = reference) | <b>1.309 [1.013; 1.691]</b> |
| Number of beds                                           | 1.003 [0.999; 1.006]        |
| Public (Voluntary = reference)                           | 1.333 [0.330; 5.390]        |
| SCOPEout rank (Low = reference)                          |                             |
| High                                                     | 2.002 [0.971; 4.128]        |
| Medium                                                   | <b>2.166 [1.029; 4.562]</b> |

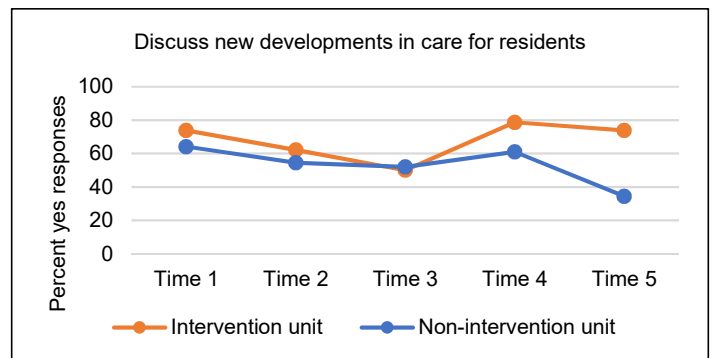

| Parameter                                                | OR [95% CI]                 |
|----------------------------------------------------------|-----------------------------|
| Age (< 25 years = reference)                             |                             |
| 25-34 years                                              | 0.468 [0.109; 2.013]        |
| 35-44 years                                              | 0.598 [0.149; 2.394]        |
| 45-54 years                                              | 0.707 [0.176; 2.835]        |
| >54 years                                                | 0.563 [0.131; 2.413]        |
| Female (Male = reference)                                | 1.643 [0.930; 2.901]        |
| Care aide (Reg. provider= reference)                     | 0.761 [0.448; 1.292]        |
| Years worked in current role                             | 1.024 [0.993; 1.056]        |
| Years worked on unit                                     | 0.996 [0.960; 1.034]        |
| Time                                                     | 0.914 [0.804; 1.040]        |
| Study group (Non-interv. = reference)                    | 0.610 [0.246; 1.516]        |
| Time by study group<br>(Time by non-interv. = reference) | <b>1.372 [1.056; 1.783]</b> |
| Number of beds                                           | <b>1.005 [1.002; 1.009]</b> |
| Public (Voluntary = reference)                           | 4.086 [0.980; 17.036]       |
| SCOPEout rank (Low = reference)                          |                             |
| High                                                     | <b>3.325 [1.622; 6.818]</b> |
| Medium                                                   | <b>3.541 [1.702; 7.368]</b> |

## Inclusion of Others in Quality Improvement Activities

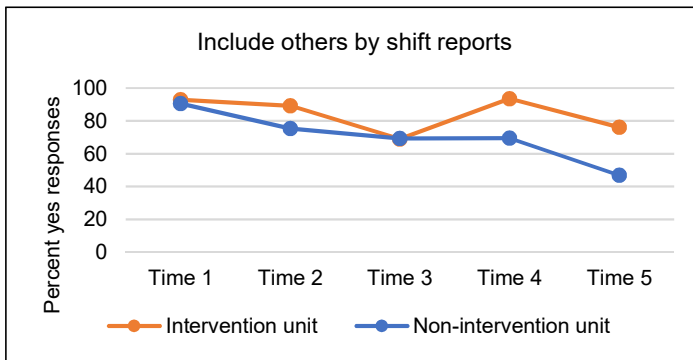

| Parameter                                             | OR [95% CI]                 |
|-------------------------------------------------------|-----------------------------|
| Age (< 25 years = reference)                          |                             |
| 25-34 years                                           | 0.646 [0.145; 2.874]        |
| 35-44 years                                           | 0.809 [0.187; 3.499]        |
| 45-54 years                                           | 0.920 [0.213; 3.976]        |
| >54 years                                             | 0.659 [0.139; 3.118]        |
| Female (Male = reference)                             | 1.313 [0.655; 2.635]        |
| Care aide (Reg. provider= reference)                  | 0.845 [0.445; 1.607]        |
| Years worked in current role                          | 1.017 [0.980; 1.057]        |
| Years worked on unit                                  | 1.000 [0.958; 1.045]        |
| Time                                                  | <b>0.697 [0.600; 0.810]</b> |
| Study group (Non-interv. = reference)                 | 0.720 [0.226; 2.292]        |
| Time by study group (Time by non-interv. = reference) | <b>1.357 [1.002; 1.837]</b> |
| Number of beds                                        | <b>1.005 [1.001; 1.009]</b> |
| Public (Voluntary = reference)                        | 2.247 [0.433; 11.673]       |
| SCOPEout rank (Low = reference)                       |                             |
| High                                                  | 1.923 [0.878; 4.211]        |
| Medium                                                | <b>3.046 [1.331; 6.973]</b> |

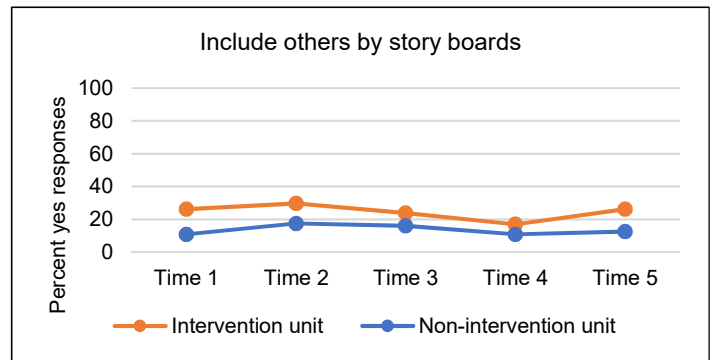

| Parameter                                             | OR [95% CI]                  |
|-------------------------------------------------------|------------------------------|
| Age (< 25 years = reference)                          |                              |
| 25-34 years                                           | 0.579 [0.095; 3.521]         |
| 35-44 years                                           | 0.586 [0.109; 3.147]         |
| 45-54 years                                           | 0.603 [0.113; 3.229]         |
| >54 years                                             | 0.277 [0.045; 1.728]         |
| Female (Male = reference)                             | 1.300 [0.451; 3.745]         |
| Care aide (Reg. provider= reference)                  | 0.817 [0.432; 1.547]         |
| Years worked in current role                          | 0.989 [0.954; 1.025]         |
| Years worked on unit                                  | 1.057 [1.013; 1.103]         |
| Time                                                  | 0.944 [0.806; 1.107]         |
| Study group (Non-interv. = reference)                 | 1.917 [0.669; 5.493]         |
| Time by study group (Time by non-interv. = reference) | 0.979 [0.711; 1.348]         |
| Number of beds                                        | 1.007 [1.000; 1.015]         |
| Public (Voluntary = reference)                        | 7.147 [0.528; 96.697]        |
| SCOPEout rank (Low = reference)                       |                              |
| High                                                  | <b>7.431 [1.557; 35.461]</b> |
| Medium                                                | <b>4.452 [1.049; 18.895]</b> |

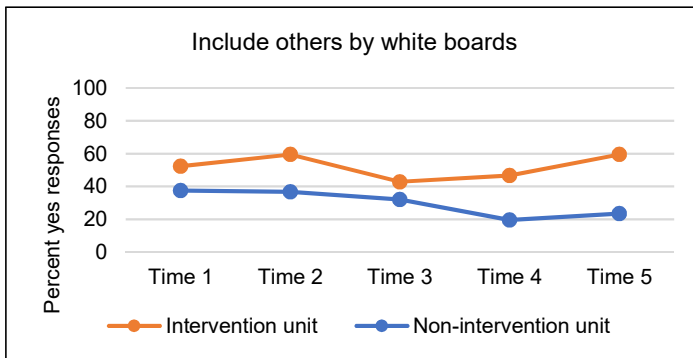

| Parameter                                             | OR [95% CI]                  |
|-------------------------------------------------------|------------------------------|
| Age (< 25 years = reference)                          |                              |
| 25-34 years                                           | 0.859 [0.170; 4.346]         |
| 35-44 years                                           | 0.571 [0.124; 2.624]         |
| 45-54 years                                           | 0.829 [0.182; 3.786]         |
| >54 years                                             | 0.591 [0.120; 2.907]         |
| Female (Male = reference)                             | 1.224 [0.638; 2.349]         |
| Care aide (Reg. provider= reference)                  | 0.690 [0.416; 1.146]         |
| Years worked in current role                          | 1.025 [0.997; 1.055]         |
| Years worked on unit                                  | 1.017 [0.982; 1.053]         |
| Time                                                  | 0.931 [0.815; 1.062]         |
| Study group (Non-interv. = reference)                 | 0.986 [0.408; 2.384]         |
| Time by study group (Time by non-interv. = reference) | <b>1.301 [1.003; 1.689]</b>  |
| Number of beds                                        | 1.004 [0.999; 1.009]         |
| Public (Voluntary = reference)                        | 3.087 [0.531; 17.949]        |
| SCOPEout rank (Low = reference)                       |                              |
| High                                                  | <b>5.030 [1.890; 13.391]</b> |
| Medium                                                | <b>5.499 [2.164; 13.976]</b> |

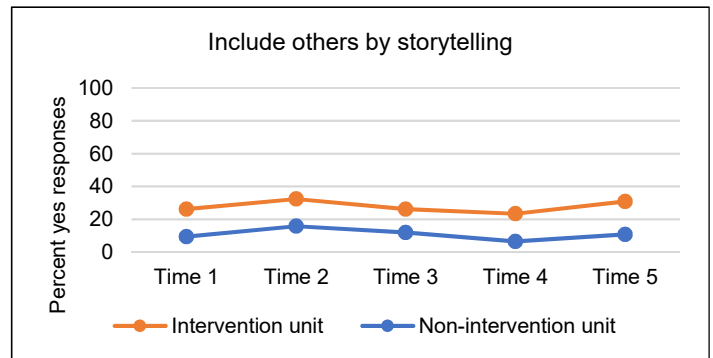

| Parameter                                             | OR [95% CI]                  |
|-------------------------------------------------------|------------------------------|
| Age (< 25 years = reference)                          |                              |
| 25-34 years                                           | 0.194 [0.033; 1.136]         |
| 35-44 years                                           | 0.171 [0.032; 0.914]         |
| 45-54 years                                           | 0.300 [0.057; 1.561]         |
| >54 years                                             | 0.239 [0.040; 1.413]         |
| Female (Male = reference)                             | 1.287 [0.431; 3.843]         |
| Care aide (Reg. provider= reference)                  | 1.124 [0.573; 2.205]         |
| Years worked in current role                          | 0.991 [0.957; 1.027]         |
| Years worked on unit                                  | 1.015 [0.972; 1.059]         |
| Time                                                  | 1.032 [0.871; 1.222]         |
| Study group (Non-interv. = reference)                 | 2.839 [0.861; 9.364]         |
| Time by study group (Time by non-interv. = reference) | 0.966 [0.679; 1.375]         |
| Number of beds                                        | 1.006 [0.999; 1.014]         |
| Public (Voluntary = reference)                        | 4.014 [0.270; 59.737]        |
| SCOPEout rank (Low = reference)                       |                              |
| High                                                  | 3.879 [0.765; 19.660]        |
| Medium                                                | <b>5.730 [1.326; 24.767]</b> |

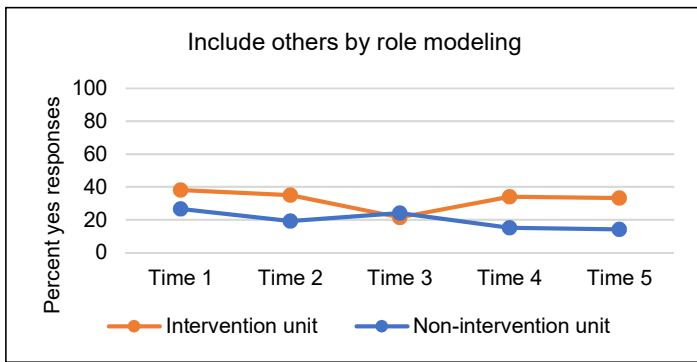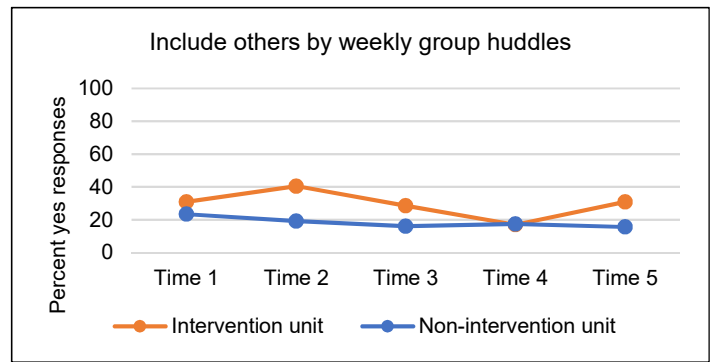

| Parameter                                                | OR [95% CI]                  |
|----------------------------------------------------------|------------------------------|
| Age (< 25 years = reference)                             |                              |
| 25-34 years                                              | 0.390 [0.056; 2.727]         |
| 35-44 years                                              | 1.300 [0.257; 6.592]         |
| 45-54 years                                              | 1.655 [0.327; 8.385]         |
| >54 years                                                | 1.412 [0.260; 7.680]         |
| Female (Male = reference)                                | 1.476 [0.641; 3.402]         |
| Care aide (Reg. provider= reference)                     | <b>0.426 [0.247; 0.732]</b>  |
| Years worked in current role                             | 0.999 [0.969; 1.029]         |
| Years worked on unit                                     | 0.996 [0.959; 1.035]         |
| Time                                                     | 0.950 [0.833; 1.082]         |
| Study group (Non-interv. = reference)                    | 1.631 [0.644; 4.133]         |
| Time by study group<br>(Time by non-interv. = reference) | 1.059 [0.817; 1.373]         |
| Number of beds                                           | <b>1.006 [1.001; 1.011]</b>  |
| Public (Voluntary = reference)                           | 4.161 [0.533; 32.459]        |
| SCOPEout rank (Low = reference)                          |                              |
| High                                                     | <b>3.540 [1.046; 11.983]</b> |
| Medium                                                   | 2.190 [0.678; 7.075]         |

| Parameter                                                | OR [95% CI]                  |
|----------------------------------------------------------|------------------------------|
| Age (< 25 years = reference)                             |                              |
| 25-34 years                                              | 1.974 [0.229; 17.010]        |
| 35-44 years                                              | 1.844 [0.239; 14.214]        |
| 45-54 years                                              | 1.734 [0.223; 13.454]        |
| >54 years                                                | 1.917 [0.229; 16.028]        |
| Female (Male = reference)                                | 1.621 [0.677; 3.884]         |
| Care aide (Reg. provider= reference)                     | <b>0.458 [0.266; 0.790]</b>  |
| Years worked in current role                             | 1.018 [0.983; 1.055]         |
| Years worked on unit                                     | 1.019 [0.979; 1.060]         |
| Time                                                     | 0.884 [0.753; 1.037]         |
| Study group (Non-interv. = reference)                    | 1.606 [0.538; 4.800]         |
| Time by study group<br>(Time by non-interv. = reference) | 1.034 [0.749; 1.426]         |
| Number of beds                                           | <b>1.007 [1.001; 1.013]</b>  |
| Public (Voluntary = reference)                           | 3.782 [0.424; 33.714]        |
| SCOPEout rank (Low = reference)                          |                              |
| High                                                     | <b>8.388 [2.404; 29.273]</b> |
| Medium                                                   | 2.547 [0.743; 8.732]         |

## Empowerment and Satisfaction with Quality of Worklife

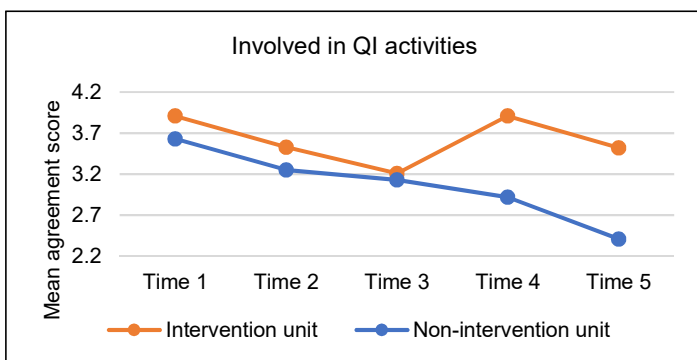

| Parameter                              | OR [95% CI]                    |
|----------------------------------------|--------------------------------|
| Age (< 25 years = reference)           |                                |
| 25-34 years                            | 0.064 [-0.772; 0.900]          |
| 35-44 years                            | 0.351 [-0.435; 1.137]          |
| 45-54 years                            | 0.341 [-0.444; 1.126]          |
| >54 years                              | 0.192 [-0.648; 1.033]          |
| Female (Male = reference)              | 0.170 [-0.199; 0.540]          |
| Care aide (Reg. provider= reference)   | -0.247 [-0.537; 0.042]         |
| Years worked in current role           | 0.00 [-0.018; 0.018]           |
| Years worked on unit                   | <b>0.025 [0.003; 0.047]</b>    |
| Time                                   | <b>-0.276 [-0.373; -0.179]</b> |
| Study group (Non-interv. = reference)  | -0.400 [-0.847; 0.048]         |
| Time by study group                    | <b>0.271 [0.138; 0.405]</b>    |
| (Time by non-interv. = reference)      |                                |
| Alberta (British Columbia = reference) | <b>6.115 [2.035; 10.195]</b>   |
| Number of beds                         | <b>-0.024 [-0.043; -0.005]</b> |
| Public (Voluntary = reference)         | <b>-2.726 [-5.449; -0.004]</b> |
| SCOPEout rank (Low = reference)        |                                |
| High                                   | <b>0.468 [0.023; 0.914]</b>    |
| Medium                                 | <b>1.075 [0.616; 1.535]</b>    |

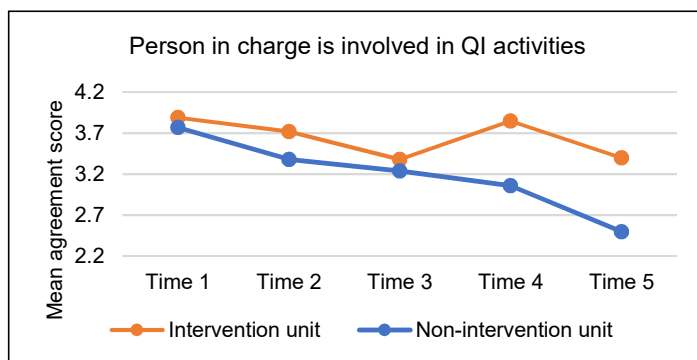

| Parameter                              | OR [95% CI]                    |
|----------------------------------------|--------------------------------|
| Age (< 25 years = reference)           |                                |
| 25-34 years                            | -0.357 [-1.139; 0.425]         |
| 35-44 years                            | -0.223 [-0.955; 0.510]         |
| 45-54 years                            | -0.250 [-0.970; 0.470]         |
| >54 years                              | -0.477 [-1.250; 0.297]         |
| Female (Male = reference)              | 0.131 [-0.239; 0.500]          |
| Care aide (Reg. provider= reference)   | <b>-0.375 [-0.698; -0.052]</b> |
| Years worked in current role           | 0.009 [-0.010; 0.028]          |
| Years worked on unit                   | 0.016 [-0.007; 0.038]          |
| Time                                   | -0.273 [-0.375; -0.170]        |
| Study group (Non-interv. = reference)  | -0.305 [-0.760; 0.150]         |
| Time by study group                    | <b>0.209 [0.066; 0.351]</b>    |
| (Time by non-interv. = reference)      |                                |
| Alberta (British Columbia = reference) | <b>6.195 [2.539; 9.852]</b>    |
| Number of beds                         | <b>-0.025 [-0.041; -0.008]</b> |
| Public (Voluntary = reference)         | <b>-2.989 [-5.501; -0.477]</b> |
| SCOPEout rank (Low = reference)        |                                |
| High                                   | 0.409 [-0.053; 0.871]          |
| Medium                                 | <b>1.097 [0.642; 1.553]</b>    |

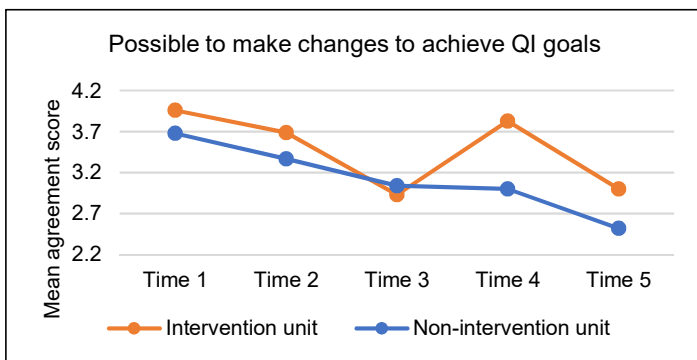

| Parameter                              | OR [95% CI]                    |
|----------------------------------------|--------------------------------|
| Age (< 25 years = reference)           |                                |
| 25-34 years                            | -0.208 [-0.923; 0.508]         |
| 35-44 years                            | -0.020 [-0.688; 0.649]         |
| 45-54 years                            | -0.127 [-0.785; 0.530]         |
| >54 years                              | -0.189 [-0.904; 0.526]         |
| Female (Male = reference)              | 0.045 [-0.345; 0.435]          |
| Care aide (Reg. provider= reference)   | -0.268 [-0.570; 0.033]         |
| Years worked in current role           | 0.006 [-0.011; 0.024]          |
| Years worked on unit                   | 0.021 [-0.001; 0.043]          |
| Time                                   | <b>-0.278 [-0.377; -0.180]</b> |
| Study group (Non-interv. = reference)  | -0.386 [-0.836; 0.064]         |
| Time by study group                    | <b>0.240 [0.102; 0.379]</b>    |
| (Time by non-interv. = reference)      |                                |
| Alberta (British Columbia = reference) | <b>5.120 [1.289; 8.951]</b>    |
| Number of beds                         | <b>-0.020 [-0.037; -0.002]</b> |
| Public (Voluntary = reference)         | -2.033 [-4.635; 0.569]         |
| SCOPEout rank (Low = reference)        |                                |
| High                                   | <b>0.558 [0.095; 1.021]</b>    |
| Medium                                 | <b>1.074 [0.619; 1.529]</b>    |

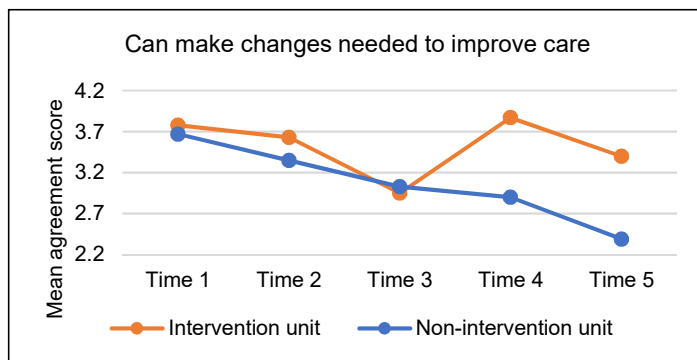

| Parameter                              | OR [95% CI]                    |
|----------------------------------------|--------------------------------|
| Age (< 25 years = reference)           |                                |
| 25-34 years                            | -0.079 [-0.807; 0.650]         |
| 35-44 years                            | -0.058 [-0.727; 0.612]         |
| 45-54 years                            | -0.028 [-0.694; 0.638]         |
| >54 years                              | -0.241 [-0.968; 0.485]         |
| Female (Male = reference)              | 0.014 [-0.407; 0.434]          |
| Care aide (Reg. provider= reference)   | <b>-0.377 [-0.686; -0.069]</b> |
| Years worked in current role           | 0.002 [-0.017; 0.021]          |
| Years worked on unit                   | 0.022 [-0.001; 0.045]          |
| Time                                   | <b>-0.304 [-0.401; -0.208]</b> |
| Study group (Non-interv. = reference)  | -0.453 [-0.911; 0.006]         |
| Time by study group                    | <b>0.275 [0.138; 0.412]</b>    |
| (Time by non-interv. = reference)      |                                |
| Alberta (British Columbia = reference) | <b>4.308 [0.457; 8.159]</b>    |
| Number of beds                         | -0.016 [-0.034; 0.001]         |
| Public (Voluntary = reference)         | -1.703 [-4.308; 0.902]         |
| SCOPEout rank (Low = reference)        |                                |
| High                                   | 0.458 [-0.018; 0.934]          |
| Medium                                 | <b>0.876 [0.403; 1.348]</b>    |
